# Supplementary material
Source: bioRxiv or medRxiv preprint supplement (https://medrxiv.org/highwire/filestream/84434/field_highwire_adjunct_files/0/2020.06.02.20117739-1.pdf)
Supplement: Supplementary file [file 2020.06.02.20117739-1.pdf]

## SUPPLEMENTARY FILE 1

### **iSCAN: An RT-LAMP-coupled CRISPR-Cas12 module for rapid, sensitive detection of SARS-CoV-2**

Zahir Ali<sup>1,\*</sup>, Rashid Aman<sup>1,\*</sup>, Ahmed Mahas<sup>1,\*</sup>, Gundra Sivakrishna Rao<sup>1</sup>, Muhammad Tehseen<sup>3</sup>, Tin Marsic<sup>1</sup>, Rahul Salunke<sup>2</sup>, Amit K. Subudhi, Sharif M. Hala, Samir M. Hamdan<sup>3</sup>, Arnab Pain<sup>2</sup>, Norhan Hassan<sup>1</sup>, and Magdy M. Mahfouz<sup>1,†</sup>

<sup>1</sup>Laboratory for Genome Engineering and Synthetic Biology, Division of Biological Sciences, 4700 King Abdullah University of Science and Technology, Thuwal 23955-6900, Saudi Arabia. <sup>2</sup>Pathogen Genomics Laboratory, BESE Division, King Abdullah University of Science and Technology (KAUST), Thuwal, Saudi Arabia. <sup>3</sup>Laboratory of DNA Replication and Recombination, Biological and Environmental Sciences and Engineering Division, King Abdullah University of Science and Technology (KAUST), Thuwal 23955-6900, Saudi Arabia.

<sup>†</sup>**Correspondence:** Magdy M. Mahfouz (magdy.mahfouz@kaust.edu.sa)

\*These authors contributed equally: Zahir Ali, Rashid Aman, and Ahmed Mahas

**Key words:** COVID-19, SARS-CoV-2, RT-LAMP, CRISPR-Cas12, nucleic acid detection, biosensors, diagnostics

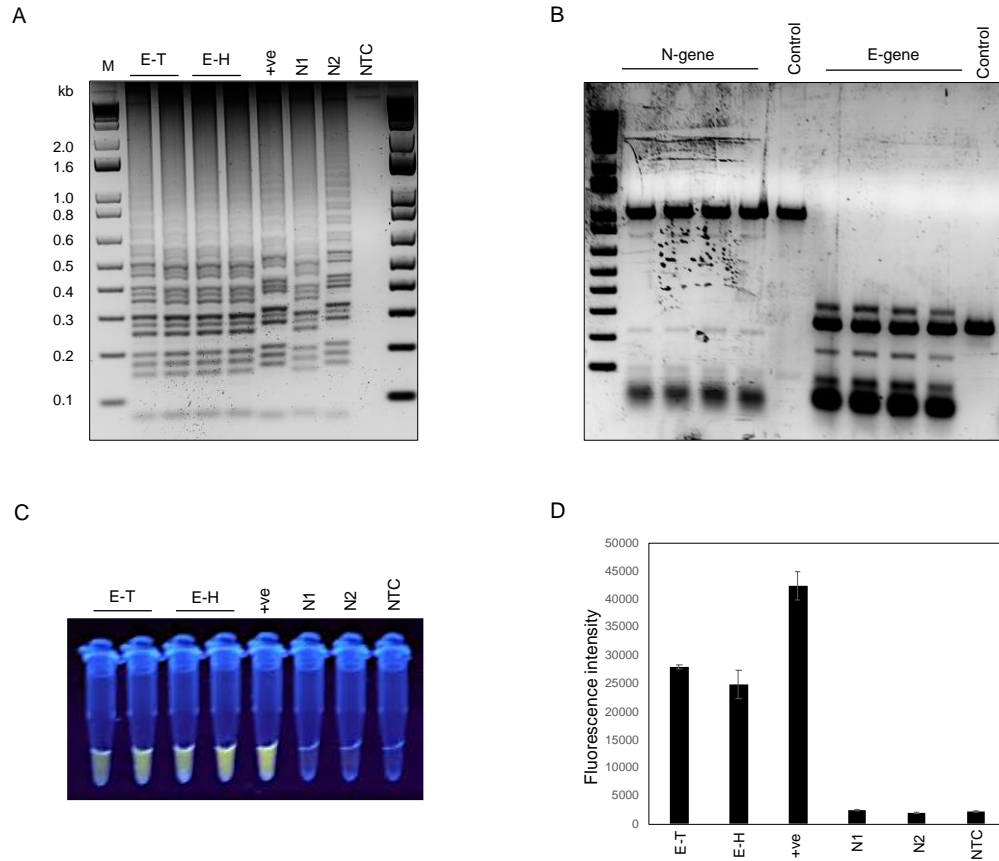

**Supplementary Figure 1: Assessment of enzyme activity and performance of the in-house produced proteins.**

- A) Visualization of the amplicons in agarose gel after RT-LAMP amplification of E-gene; E-T: E-gene detection in Tris buffer, E-H: E-gene detection in HEPES buffer, +ve: E-gene detection with commercial enzymes, N1: sample without crRNA, N2: sample with NS-crRNA, NTC: No template control.
- B) Cas12a based restriction of target dsDNA. Visualization of the fragments generated by Cas12a cis-cleavage of the target regions in agarose gel.
- C) Visual fluorescence readout after Cas12a collateral activity; E-T: E-gene detection in Tris buffer, E-H: E-gene detection in HEPES buffer, +ve: E-gene detection with commercial enzymes, N1: sample without crRNA, N2: sample with NS-crRNA, NTC: sample without template.
- D) Quantification of fluorescence signal after Cas12a collateral cleavage of reporters; E-T: E-gene detection in Tris buffer, E-H: E-gene detection in HEPES buffer, +ve: E-gene detection with commercial enzymes, N1: sample without crRNA, N2: sample with NS-crRNA, NTC: sample without template. Values are shown as mean  $\pm$ SD (n=3).

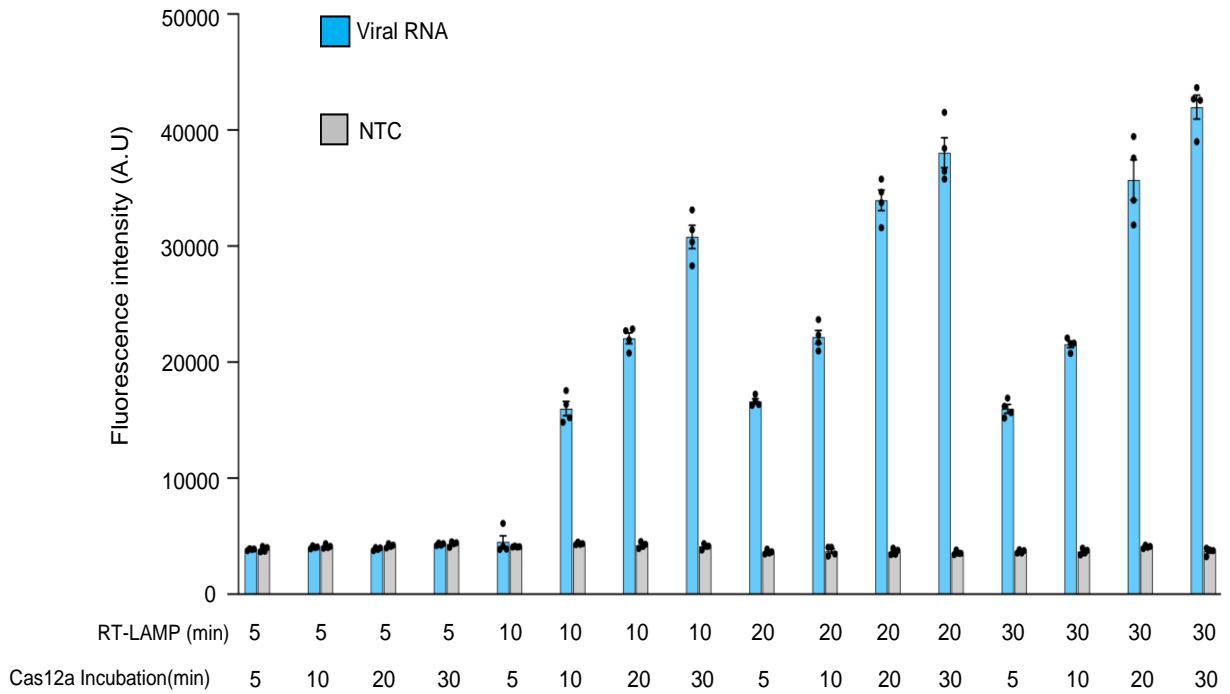

**Supplementary Figure 2: RT-LAMP and Cas12a time course optimization of detection assay duration.**

The figure depicts different combinations of RT-LAMP assay and Cas12a duration times. Synthetic SARS-CoV-2 RNA was used at 10 Copies per reaction. NTC: no template control. Values are shown as mean  $\pm$ SD (n=4).

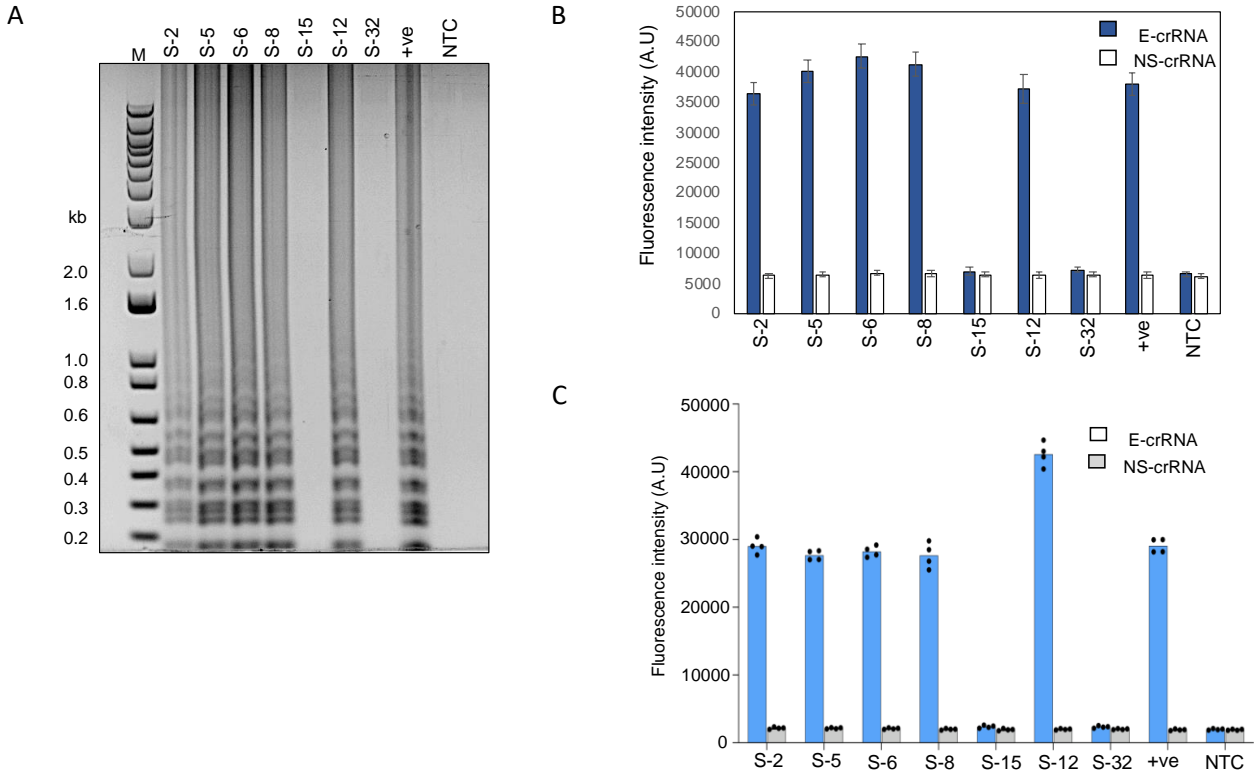

### Supplementary Figure 3: Detection of SARS-CoV-2 RNA extracted from patient samples

- A) RT-LAMP generated amplification products with primer set targeting E-gene in agarose gel. S - RNA isolated from different clinical samples: +ve: synthetic SARS-CoV-2 RNA; NTC: no template control. M: Marker.
- B) Fluorescence signal of different clinical samples after Cas12a-based detection assay using FAM- Q reporter; E-crRNA: assay performed with E-gene crRNA, NS-crRNA: assay performed with non-specific crRNA. Values are shown as mean  $\pm$ SD (n=3).
- C) Fluorescence signal of the samples after Cas12a-based detection assay using commercial HEX reporter; E-crRNA: assay performed with E-gene crRNA, NS-crRNA: assay performed with non-specific crRNA. Values are shown as mean  $\pm$ SD (n=4).

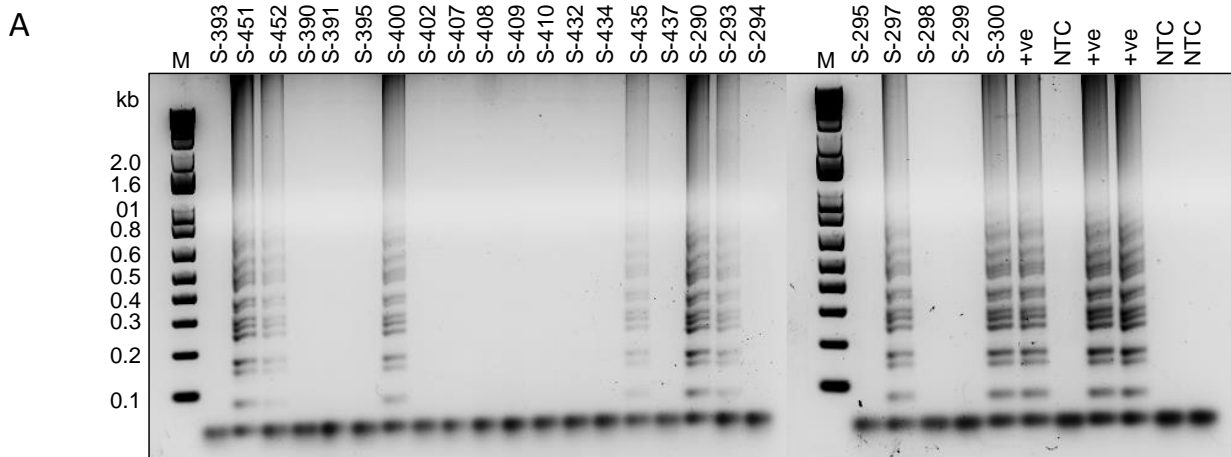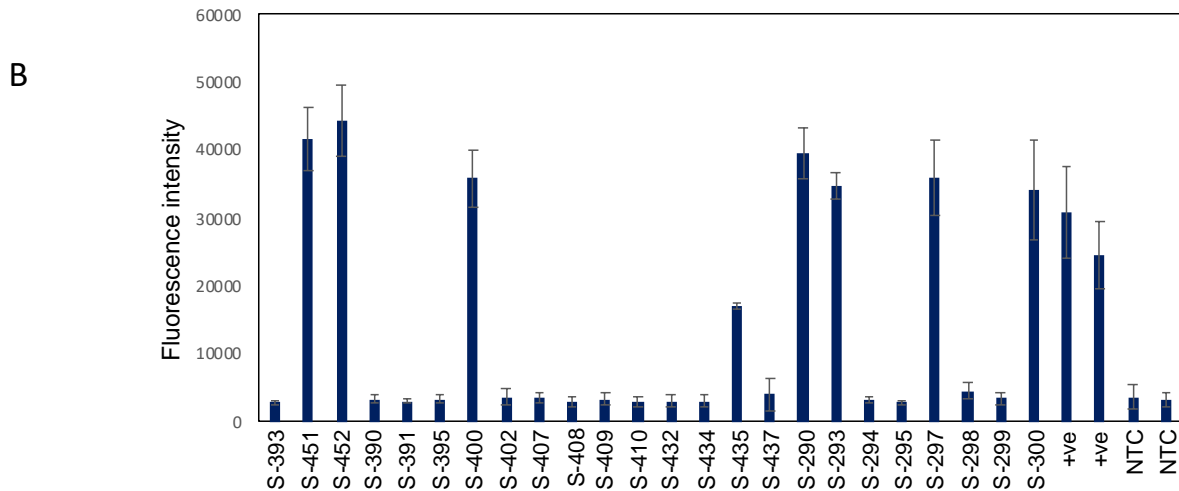

**Supplementary Figure 4: Cas12a detection of SARS-CoV-2 RNA extracted from 24 patient samples using *E* gene assay**

- A) RT-LAMP amplification product of E-gene. Positive control: RT-LAMP with synthetic RNA. NTC: No template control.
- B) Cas12a-based fluorescence detection performed with E-gene crRNA. Values are shown as mean  $\pm$ SD (n=3).

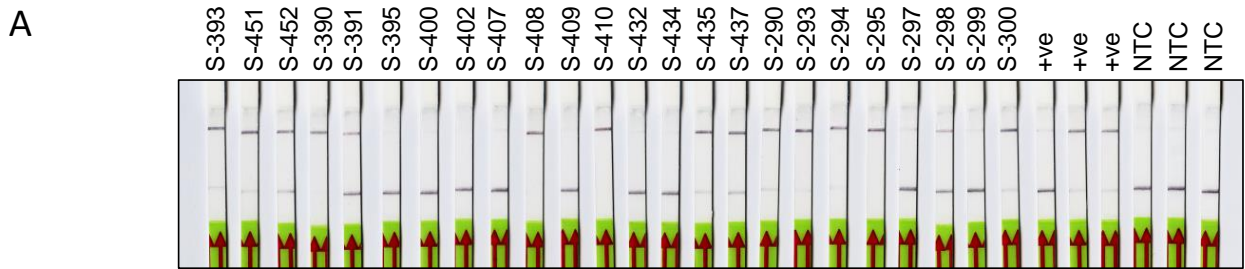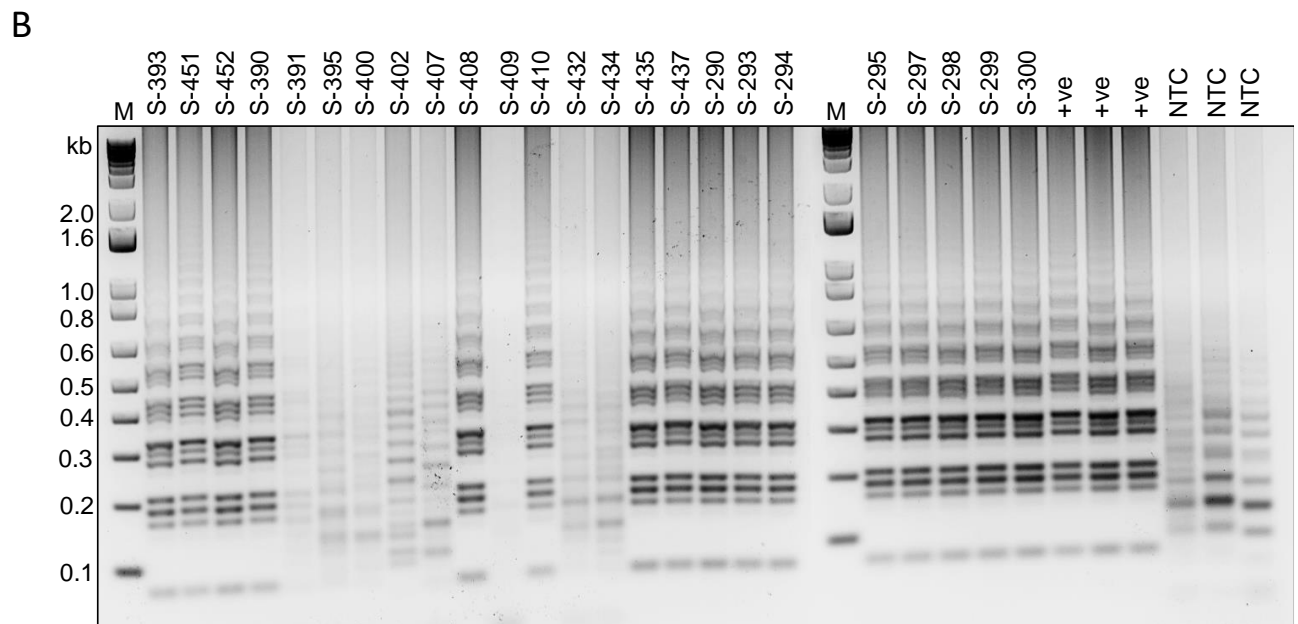

**Supplementary Figure 5: Cas12a detection of SARS-CoV-2 RNA extracted from 24 patient samples using the *N* gene assay**

A) Visual readout of the results using lateral flow strips

B) Visualization of RT-LAMP generated amplification products in agarose gel.

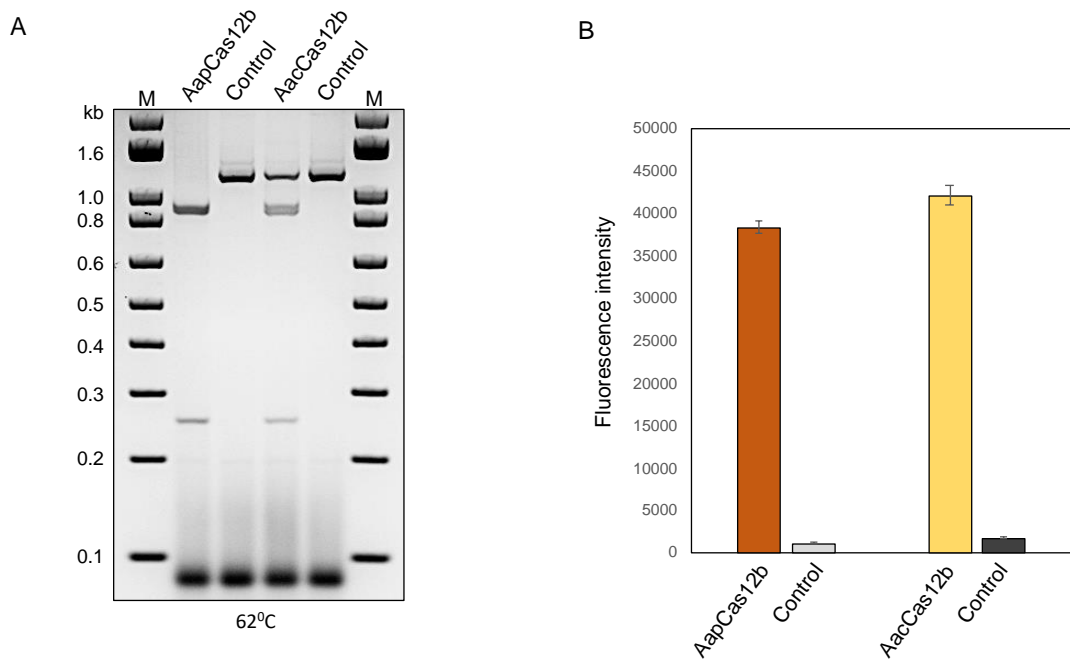

**Supplementary Figure 6: AapCas12b and AacCas12b cis- and trans cleavage activity assay**

- A) AapCas12b and AacCas12b cis cleavage activity assay performed at 62°C for 30 minutes
- B) AapCas12b and AacCas12b trans cleavage activity assay. Values shown as mean  $\pm$ SD (n=3).

A

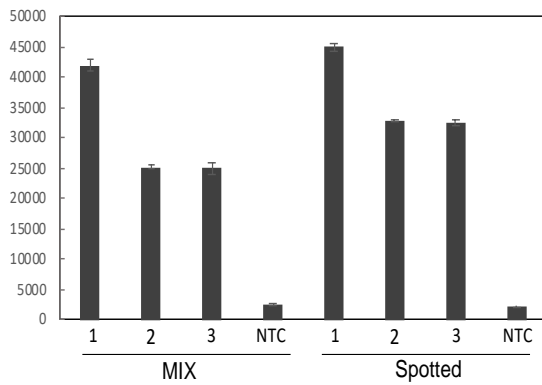

B

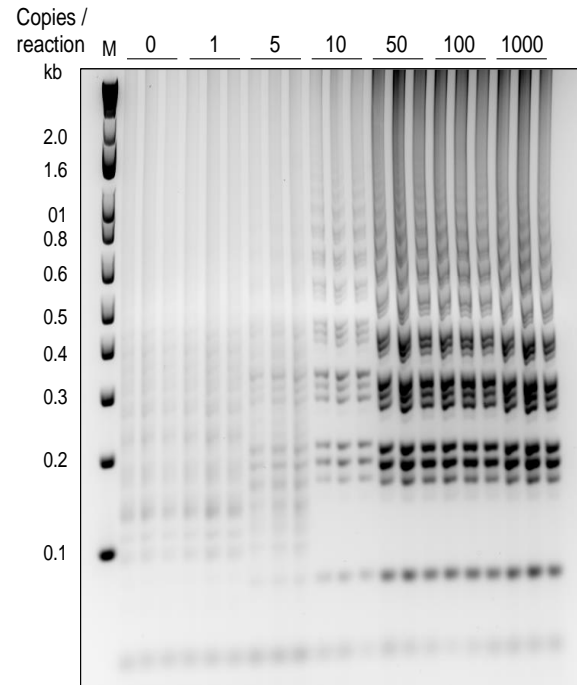

C

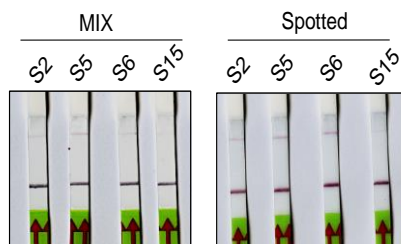

### Supplementary Figure 7: Optimization of Cas12b detection activity

- A) Comparison between the spotted one-pot and all mixed one-pot reactions for detection of SARS-CoV-2 synthetic RNA. NTC: No template control. Values are shown as mean  $\pm$ SD (n=3).
- B) Determination of Cas12b spotted one-pot LoD using synthetic RNA in a serial dilution series.
- C) Representatives of lateral flow readouts for detection of SARS-CoV-2 in 4 clinical samples with spotted one-pot Cas12b detection.



**Supplementary Table 1: LAMP Primers**

| <b>Primer Name</b> | <b>Sequence</b>                                 | <b>Targeted region</b> |
|--------------------|-------------------------------------------------|------------------------|
| Gene N-B-F3 *      | ACCGAAGAGCTACCAGACG                             | N gene-1               |
| Gene N-B-B3 *      | TGCAGCATTGTTAGCAGGAT                            | N gene-1               |
| Gene N-B-FIP *     | TCTGGCCCAGTTCCTAGGTAGTTCGTGGTGGTGACGGTAA        | N gene-1               |
| Gene N-B-BIP*      | AGACGGCATCATATGGGTTGCACGGGTGCCAATGTGATCT        | N gene-1               |
| Gene N-B-LF *      | CCATCTTGGACTGAGATCTTTCATT                       | N gene-1               |
| Gene N-B-LB *      | ACTGAGGGAGCCTTGAATACA                           | N gene-1               |
| F3-N3-1            | CCGAAGAGCTACCAGACGAA                            | N gene-2               |
| B3-N3-1            | TGTAGCACGATTGCAGCATT                            | N gene-2               |
| FIP-N3-1           | TCTGGCCCAGTTCCTAGGTAGTGGTGGTGACGGTAAAATGAAAG    | N gene-2               |
| BIP-N3-1           | AGACGGCATCATATGGGTTGCACGGGTGCCAATGTGATCT        | N gene-2               |
| LF-N3-1            | AGAAATACCATCTTGGACTGAG                          | N gene-2               |
| LB-N3-1            | ACTGAGGGAGCCTTGAATACAC                          | N gene-2               |
| F3-E-2             | GTA CTCATTTCGTTTCGGAAG                          | E gene                 |
| B3-E-1             | AGGAACTCTAGAAGAATTCAGAT                         | E gene                 |
| FIP-E-2            | GGATGGCTAGTGTA ACTAGCAAGGGTACGTTAATAGTTAATAGCGT | E gene                 |
| BIP-E-2            | CGCTTCGATTGTGTGCGTACGAGAGTAAACGTAAAAAGAAGGTT    | E gene                 |
| LF-E-2             | ACCACGAAAGCAAGAAAAAG                            | E gene                 |
| LB-E-1             | GCTGCAATATTGTTAACGTGAGTCT                       | E gene                 |

\* Primers used in [1].

**Supplementary Table 2: Primers used to for *in vitro* transcription and PCR amplification of target genes.**

| Primer Name      | Sequence                                           | Purpose                                                                                                                                                                         |
|------------------|----------------------------------------------------|---------------------------------------------------------------------------------------------------------------------------------------------------------------------------------|
| N gene-F         | GAAATTAATACGACTCACTATAGGGAG<br>GCTTCTAAGAAGCCTCGGC | To PCR amplify N gene-2 out of IDT kit control.                                                                                                                                 |
| N gene-R         | GGCTCTGTTGGTGGGAATG                                | To PCR amplify N gene-2 out of IDT kit control.                                                                                                                                 |
| T7-3G IVT primer | GAAATTAATACGACTCACTATAGGG                          | <ul style="list-style-type: none"> <li>- To anneal with Cas12a crRNA oligos for <i>in vitro</i> transcription</li> <li>- To use as F primer to amplify Cas12b sgRNAs</li> </ul> |

**Supplementary Table 3: SARS-CoV-2 gBlocks targeted sequences**

|               |                                                                                                                                                                                                                                                                                                                                                                               |
|---------------|-------------------------------------------------------------------------------------------------------------------------------------------------------------------------------------------------------------------------------------------------------------------------------------------------------------------------------------------------------------------------------|
| <b>E gene</b> | <p>gaaattaatac<span style="color: red;">gactcactatagg</span>GGGAACCAATTTATGATGAACCGACGACGACTA<br/> CTAGCGTGCCCTTTGTAAGCACAAAGCTGATGAGTACGAACTTATGTACTCA<br/> TTCGTTTCGGAAGAGACAGGTACGTTAATAGTTAATAGCGTACTTCTTTT<br/> TCTTGCTTTCGTGGTATTCTTGCTAGTTACACTAGCCATCCTTACTGCGCT<br/> TCGATTGTGTGCGTACTGCTGCAATATTGTTAACGTGAGTCTTGTA<br/> AAACCTTCTTTTACGTTACTCTCGTGTTAAAAATCTGAA</p> |
|---------------|-------------------------------------------------------------------------------------------------------------------------------------------------------------------------------------------------------------------------------------------------------------------------------------------------------------------------------------------------------------------------------|

**Supplementary Table 4: LbCas12a crRNAs and Cas12b sgRNAs**

| <b>Cas Enzyme</b> | <b>gRNA Sequence 5`-3`</b>                                                                                                                   | <b>Genomic Region</b> |
|-------------------|----------------------------------------------------------------------------------------------------------------------------------------------|-----------------------|
| LbCas12a          | GTA ACTAGCAAGAATACCACATCTACACTTAGTAGAA<br>ATTACCCTATAGTGAGTCGTATTAATTTC                                                                      | E gene                |
|                   | GGACTTCCCTATGGTGCTAAATCTACACTTAGTAGAA<br>ATTACCCTATAGTGAGTCGTATTAATTTC                                                                       | N gene                |
| Cas12b            | ATATTGCAGCAGTACGCACAGTGCCACTTCTCAGATT<br>TGAG                                                                                                | E gene                |
|                   | GCTGGACTTCCCTATGGTGCGTGCCACTTCTCAGATT<br>GAG                                                                                                 | N gene                |
| Cas12b scaffold-F | GAAATTAATACGACTCACTATAGGGTCTAGAGGACA<br>GAATTTTTCAACGGGTGTGCCAATGGCCACTTTCCAG<br>GTGGCAAAGCCCGTTGAGCTTc <sub>t</sub> caaatctgaGAAGTGGCA<br>C |                       |
| Cas12b scaffold-R | GTGCCACTTc <sub>t</sub> cagatttgaGAAGCTCAACGGGCTTTGCCA<br>CCTGGAAAGTGGCCATTGGCACACCCGTTGAAAAATT<br>CTGTCCTCTAGACCCTATAGTGAGTCGTATTAATTTC     |                       |

## Reference

1. Zhang, Y., et al., *Rapid Molecular Detection of SARS-CoV-2 (COVID-19) Virus RNA Using Colorimetric LAMP*. medRxiv, 2020.
